# Supplementary material
Source: bioRxiv or medRxiv preprint supplement (https://www.medrxiv.org/highwire/filestream/77104/field_highwire_adjunct_files/0/2020.04.02.20046375-1.pdf)
Supplement: Supplementary file [file 2020.04.02.20046375-1.pdf]

Supplementary Note 1: Supplementary Figures

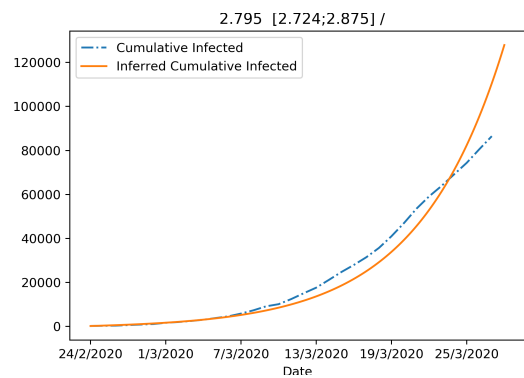

Fig. 8. Figure showing the fit of the SEIR model with no Quarantine (no changes in betas allowed).

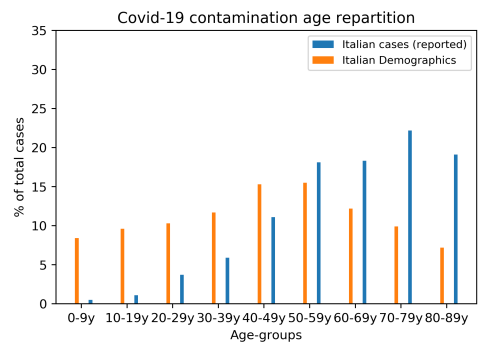

Fig. 9. Demographics age repartition of Italy along with the age distribution of reported cases.

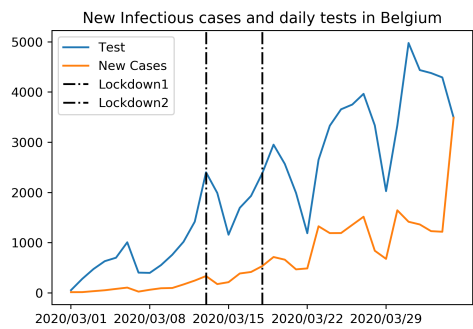

Fig. 10. Evolution of tests and new infectious cases in Belgium over time.
